# Supplementary material for: Quantitative analysis of nitro-polycyclic aromatic hydrocarbons in PM2.5 samples with graphene as a matrix by MALDI-TOF MS
Source: Royal Society of Chemistry journal article supplement (doi:10.1039/c5ay00341e), 2015-01-01
Supplement: c5ay00341e1.pdf [file c5ay00341e1.pdf]

## **Quantitative analysis of nitro-polycyclic aromatic hydrocarbons in PM<sub>2.5</sub> samples with graphene as a matrix by MALDI-TOF MS**

Nengxuan Ma<sup>a,b</sup>, Wei Bian<sup>a</sup>, Ruijin Li<sup>a</sup>, Hong Geng<sup>a</sup>, Jiangang Zhang<sup>a</sup>, Chuan Dong<sup>a</sup>, Shaomin Shuang<sup>\*a</sup>, Zongwei Cai<sup>\*b</sup>

*<sup>a</sup>Institute of Environmental Science; Department of Chemistry, Shanxi University, Taiyuan 030006, P.R. China*

*<sup>b</sup>State Key Laboratory of Environmental and Biological Analysis, Department of Chemistry, Hong Kong Baptist University, Hong Kong SAR, China*

### **Supplementary Information**

#### **Synthesis of 9-nitroanthracene-*d*<sub>9</sub>**

0.9411 g of powdered anthracene-*d*<sub>10</sub> and 5 mL of glacial acid were added into a 50 mL three-necked round-bottomed flask with a 25 mL dropping funnel and an electromagnetic stirrer. The flask was immersed in a water bath at 20-25 °C, and 0.45 mL of concentrated nitric acid (70 % by weight) was added slowly from the dropping funnel with stirring vigorously. The rate of addition was controlled and the reaction temperature did not exceed 30 °C. After all of nitric acid has been added, the mixture was stirred until a clear solution was obtained, then stirring was continued for 1 h. The solution was filtered to remove unreacted anthracene-*d*<sub>10</sub>, and a mixture of 3 mL of concentrated hydrochloric acid (37 % by weight) and 3 mL of glacial acetic acid was added dropwise to the filtrate with vigorous stirring. The pale-yellow precipitate which forms was separated by suction filtration on a sintered-glass funnel and was washed with a small amount of glacial acetic acid. The obtained orange compound was removed from the funnel and triturated thoroughly with 20 mL of warm (>60 °C) 10 % sodium hydroxide solution. The product was separated from the warm slurry by suction filtration and was finally washed thoroughly with warm water (>60 °C) until the washings were neutral. The crude 9-nitroanthracene-*d*<sub>9</sub> was dried and recrystallized from glacial acetic acid.

#### **Characterization of 9-nitroanthracene-*d*<sub>9</sub>**

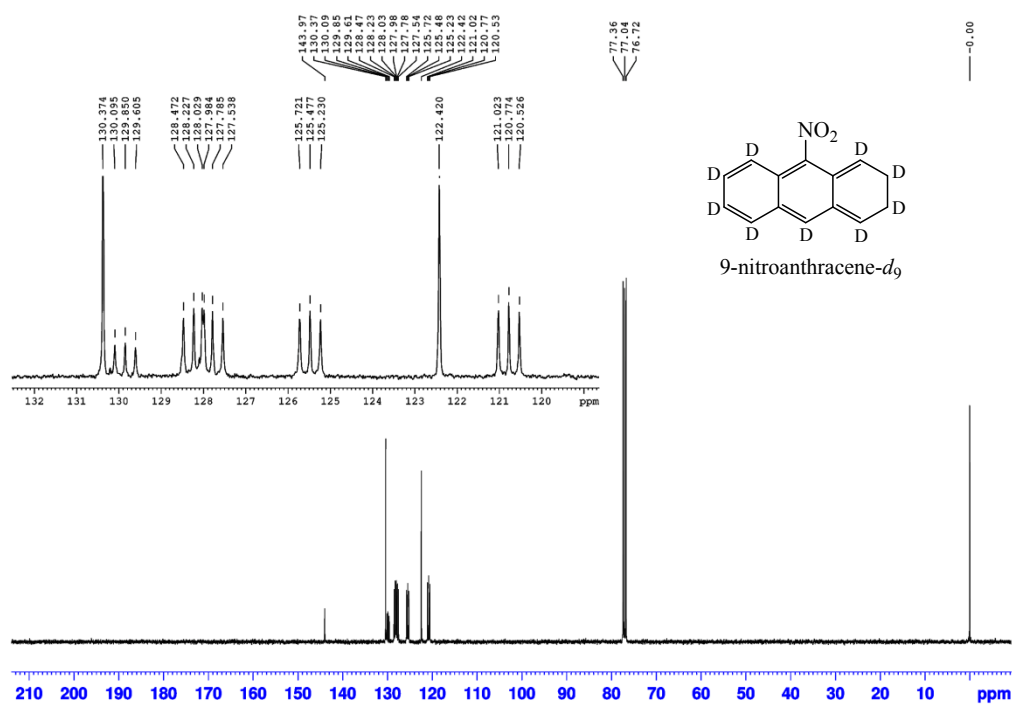

Fig. 1  $^{13}\text{C}$ NMR chart of 9-nitroanthracene- $d_9$ ( $\text{CDCl}_3$ , 400 MHz)

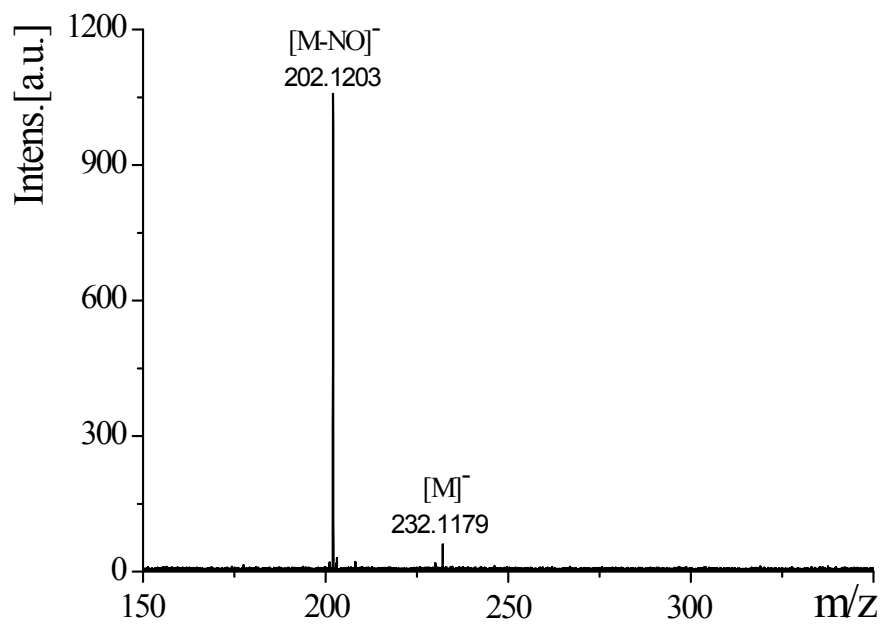

Fig. 2 MALDI-TOF MS chart of 9-nitroanthracene- $d_9$

Table S1. The linear response ranges and detection limits of 1-NP from different analytical methods.

| Quantified compound name | Detection method | Linear ranges              | LOD             | Reference  |
|--------------------------|------------------|----------------------------|-----------------|------------|
| 1-NP                     | HPLC-FL          | 0.01-7 $\mu$ g/mL          | 2.20pg          | 49         |
| 1-NP                     | HPLC-MS          | 0.01-10ng/mL               | 0.001ng         | 67         |
| 1-NP                     | GC-EI/MS         | 200-1000ng/mL              | 200pg           | 68         |
| 1-NP                     | GC-NCI/MS        | 1-50ng/mL                  | 0.1pg           | 16         |
| 1-NP                     | MALDI-TOFMS      | 0.005-0.5 $\mu$ g/ $\mu$ L | 0.74ng/ $\mu$ L | This work* |

\* MALDI-TOF MS instrument detection limit.
